# Supplementary material for: Thermal imaging through hot emissive windows
Source: PubMed Central journal article supplement — Commun Eng. 2024 Nov 16;3:172. doi: 10.1038/s44172-024-00316-y (PMC11569156; doi:10.1038/s44172-024-00316-y), 2024-11-16
Supplement: 44172_2024_316_MOESM1_ESM.pdf [file 44172_2024_316_MOESM1_ESM.pdf]

1                   **Supplimentary information: Thermal imaging**  
 2                   **through hot emissive windows**

3                   Ciril Samuel Prasad<sup>1,3</sup>, Henry O. Everitt<sup>2,3</sup> and Gururaj V.  
 4                   Naik<sup>3\*</sup>

5                   <sup>1\*</sup>Applied Physics Graduate Program, Smalley-Curl Institute,  
 6                   Rice University, 6100 Main St., Houston, 77005, Texas, USA.

7                   <sup>2</sup>DEVCOM Army Research Laboratory-South, 6100 Main St.,  
 8                   Houston, 77005, Texas, USA.

9                   <sup>3</sup>Electrical & Computer Engineering, Rice University, 6100 Main  
 10                   St., Houston, 77005, Texas, USA.

11                   \*Corresponding author(s). E-mail(s): [guru@rice.edu](mailto:guru@rice.edu);  
 12                   Contributing authors: [csp7@rice.edu](mailto:csp7@rice.edu); [he5@rice.edu](mailto:he5@rice.edu);

13                   **Supplementary Note 1 : Analytical model for coupled**  
 14                   **resonator system**

15                   We describe the coupled resonator system for AMW using a  $2 \times 2$  non-  
 16                   Hermitian Hamiltonian.

$$\hat{H} = \begin{pmatrix} \omega_0 & \kappa \\ \kappa & \omega_0 + i\gamma \end{pmatrix} \quad (\text{S1})$$

17                   This Hamiltonian describes a lossless resonator coupled to a lossy resonator  
 18                   with damping  $\gamma$ .  $\omega_0$  is the resonance frequency of the individual resonators.  
 19                   By varying coupling constant  $\kappa$ , the system can be brought through a phase  
 20                   transition. The two hybridized modes of this coupled resonator system will

21 have complex frequency values as determined by the two eigenvalues of Eq. S1  
22 (see Fig. S1). When the two resonators are strongly coupled (large  $\kappa$ ), the  
23 two modes have distinct real parts resulting in two emission frequencies. The  
24 imaginary part of eigenfrequencies remains the same for both modes. On the  
25 contrary, in the weak coupling regime (small  $\kappa$ ), the real part of the eigen fre-  
26 quencies remains the same. Here, the two complex eigen frequencies associated  
27 with the two hybridized modes of the system have distinct imaginary parts,  
28 indicating that the losses experienced by the two modes are different.

## 29 **Supplementary Note 2 : Electric field intensity and** 30 **Poynting vector plots from simulations of CW and** 31 **AMW structures.**

32 Full wave electromagnetic simulations were used to calculate the cross-sectional  
33 electric field distribution inside CW resonators at its resonant wavelength of  
34  $3.06 \mu\text{m}$  (Fig. S2a). The fields are well confined within the disks as expected  
35 for a QBIC mode. The damping from the titanium layer is the source of the  
36 absorption loss or thermal emission in both CW and AMW resonators as may  
37 be observed in the divergence of the Poynting vector (Fig.S2, c and d).

## 38 **Supplementary Note 3 : Design of control window (CW)**

39 The two weakly coupled resonators in AMW give rise to two eigen values with  
40 the same real part and different imaginary parts. Each eigen mode correspond-  
41 ing to its eigen value is mostly confined in the respective resonator. The mode  
42 confined to the lossless resonator corresponds to the eigen value with smaller  
43 imaginary part and the other corresponds to the eigen value with a larger  
44 imaginary part. The spatial localization of the modes with different damping  
45 rates (imaginary part of eigen values) leads to a gradient in absorption loss.

46 The CW is chosen to not have such spatial distribution of absorption loss.  
47 Hence, only one resonator is array to make the CW. The QBIC and mode  
48 localization properties hold good for CW as well as AMW. However, there is  
49 only one eigen value with a non-zero imaginary part for the CW. The mode  
50 corresponding to it is damped due to its interaction with the thin titanium  
51 layer on top of the Si disk. This situation is exactly the same for the top  
52 resonator of AMW.

53 Since the AMW and CW are both resonant, support QBIC, and experience  
54 the same total damping (from the 10 nm thick Ti layer), their comparison is  
55 fair. Also, the CW chosen here has a resonant emissivity comparable to that  
56 of common IR windows at elevated temperatures. Fig. S5 shows the emissiv-  
57 ity spectra of CW, fused silica, and sapphire at high temperatures. The CW  
58 slightly exaggerates the emissivity of fused silica and sapphire windows near  
59 their passband edges.

60 The substrate in our proof of concept demonstration has less significance  
61 as the Ti topping on the resonator creates the loss asymmetry. We needed a  
62 low-loss substrate with minimal emission to minimize the substrate-induced  
63 effects and highlight metasurface-induced asymmetry. Materials like ZnSe and  
64 ZnS are excellent, widely-used choices for room-temperature applications in  
65 the mid-IR and far-IR. However, these materials' stability at higher tempera-  
66 tures is poor. Fused silica has high thermal stability and is also transparent at  
67 wavelengths shorter than  $4.5 \mu\text{m}$  (Fig. S5b) , which is why we used it for our  
68 demonstration.

69 A metal layer is not necessary to achieve required functionality provided  
70 the substrate contain losses to create the asymmetry. To illustrate this, we  
71 show in Fig. S3 that a multilayer structure supporting coupled Fabrey Perot  
72 resonances can enhance the contrast by suppressing emission from a lossy

73 dielectric substrate ( $n_0 = 3$ ,  $k_0 = 0.05$ ). The transition from tight coupling to  
 74 weak coupling can be observed in the emissivity plot in Fig. S3b suggesting  
 75 the concepts discussed in the manuscript (Fig. 2e) hold true here as well.  
 76 The weakly coupled system (spacer = 450 nm) suppress the emission from  
 77 substrate in  $\epsilon_-$  (Fig. S3c) and enhances the transmission (Fig. S3d) suggesting  
 78 an improvement in  $\chi$ .

### 79 **Supplementary Note 4 : Calculated and measured** 80 **emissivity spectra for CW and AMW at 873 K**

81 The calculated and measured emissivity spectra used to generate the  $\Delta\epsilon$   
 82 spectra in Fig.3b and 3c are shown in Fig. S4 a and b respectively.

### 83 **Supplementary Note 5 : Transmitted and emitted power** 84 **for AMW and CW**

85 For finite bandwidth operation, the ratio  $\frac{T}{\epsilon}$  translates to the ratio of transmit-  
 86 ted power to emitted power by the window. Considering the thermal camera  
 87 operates in a 3-3.5  $\mu\text{m}$  band and the windows at 873 K, the power emitted  
 88 (at normal angle) with emissivities  $\epsilon_-$  and  $\epsilon_+$  for CW and AMW is calculated  
 89 using Eq. S4 and shown in Table 1. We also calculate the integrated trans-  
 90 mitted power when a blackbody at the same temperature is placed behind  
 91 the windows. For these calculations, we use the experimental emissivity and  
 92 transmission data reported in Figs—3C and 3E.

| Window | Emitted Power with $\epsilon_-$ | Emitted Power with $\epsilon_+$ | Transmitted Power |
|--------|---------------------------------|---------------------------------|-------------------|
| CW     | 4.81                            | 6.65                            | 2.26              |
| AMW    | 3.13                            | 4.71                            | 3.27              |

**Table 1** Integrated emitted and transmitted power (at normal angle) by CW and AMW considering a blackbody as the target. Both the window and blackbody is at 873 K and all power is in units  $10^8 \text{ W/m}^2\text{ster}$

93 CW, and AMW don't show substantial differences in emission asymmetry.  
 94 However, the critical advantage of AMW here is the effective transmission  
 95 (44% more than CW) and suppression of emitted power (34% less than CW)  
 96 in  $\epsilon_-$ . This results in the two-times contrast enhancement shown in Fig. 4c of  
 97 the main text.

## 98 **Supplementary Note 6 : Weber's formula for quantifying** 99 **contrast**

100 Weber's formula for quantifying simple contrast for an object placed on a  
 101 background at a given wavelength ( $\lambda$ ) is given by

$$CR(T_{Obj}) = \frac{|I_{Obj} - I_{BG}|}{I_{BG}} \quad (\text{S2})$$

102 where  $I_{Obj}$  and  $I_{BG}$  are the values of integrated power emitted per unit area  
 103 of the object and background, respectively, that reaches the camera. The inte-  
 104 grals for power run in the spectral and spatial bandwidths of the camera. In  
 105 the presence of an emissive window between the object and camera, the con-  
 106 trast equation should be modified to include the thermal emission ( $I_W$ ) and  
 107 transmission ( $\mathcal{T}$ ) of the window.

$$CR = \frac{|\mathcal{T}I_{Obj} + I_W - (\mathcal{T}I_{BG} + I_W)|}{\mathcal{T}I_{BG} + I_W} \quad (\text{S3})$$

108 Note that the far-field thermal radiation at temperature  $T$  from any surface  
 109 of emissivity  $\epsilon$  is given by:

$$I(T) = \int_0^{\theta_c} \int_{\lambda_2}^{\lambda_1} \epsilon(\lambda, T) \Theta_{BB}(\lambda, T) d\lambda d\theta \quad (\text{S4})$$

110 where  $\Theta_{BB}(\lambda, T)$  is the power spectral density of an ideal blackbody at  
 111 temperature  $T$ , and  $\theta_c$  is the maximum collection angle of the camera with  
 112 an operating bandwidth of  $(\lambda_1, \lambda_2)$ . In the limit of infinitesimal bandwidth  $\Delta\lambda$   
 113 around a central wavelength  $\lambda$ ,  $I(\lambda, T) = \epsilon(\lambda, T)I_{BB}(\lambda, T)\Delta\lambda$ . Here,  $I_{BB}$  is  
 114 the blackbody power spectral density integrated over the camera's acceptance  
 115 solid angle. Using this expression for thermal radiation in Eq. S3, the image  
 116 contrast at any given wavelength is given by:

$$CR(T_{Obj}, T_W) = \frac{|1 - \frac{\epsilon_{obj}(T_{Obj})}{\epsilon_{BG}(T_{Obj})}|}{1 + \frac{\epsilon(T_W) I_{BB}(T_W)}{\epsilon_{BG}(T_{Obj}) \mathcal{T}(T_W) I_{BB}(T_{Obj})}} \quad (S5)$$

117 where the emissivities of the object, background, and the window (toward  
 118 the camera) are  $\epsilon_{obj}$ ,  $\epsilon_{BG}$ ,  $\epsilon$ , respectively. We always assume that the object  
 119 and its background are at the same temperature.

120 Eq.1 in main text follows from Eq. S5 if  $T_{Obj} = T_W$ .

121 Since most thermal cameras operate in a spectral bandwidth  $(\lambda_1 - \lambda_2)$ , we  
 122 define an integrated CR (ICR) inside this bandwidth as:

$$ICR(T_{Obj}, T_W) = \frac{|1 - \frac{\int_{\lambda_1}^{\lambda_2} \mathcal{T}(T_W) \epsilon_{obj}(T_{Obj}) I_{BB}(T_{Obj}) d\lambda}{\int_{\lambda_1}^{\lambda_2} \mathcal{T}(T_W) \epsilon_{BG}(T_{Obj}) I_{BB}(T_{Obj}) d\lambda}|}{1 + \frac{\int_{\lambda_1}^{\lambda_2} \epsilon(T_W) I_{BB}(T_W) d\lambda}{\int_{\lambda_1}^{\lambda_2} \mathcal{T}(T_W) \epsilon_{BG}(T_{Obj}) I_{BB}(T_{Obj}) d\lambda d\lambda}} \quad (S6)$$

## 123 **Supplementary Note 7 : Thermal imaging and contrast** 124 **mapping**

125 The imaging object was fabricated using standard e-beam lithography fol-  
 126 lowed by carbon coating on a polished tungsten chip (MTI-corp) 0.5 mm  
 127 thick (see Fig. S6a). The object chip was placed inside a vacuum chamber  
 128 (MicroOptik-MHCS1200) with a water-cooled ZnSe window on a heating stage.  
 129 The metasurface (Fig. S6b) was placed directly on top of this object chip and  
 130 the stage was heated to 873 K. A thermal camera (FLIR A6701) that operates

131 in the 3-5  $\mu\text{m}$  wavelength range was used to capture the thermal images of  
 132 the object chip through the metasurface. An IR bandpass filter (BP-3.25/BP-  
 133 4.75) was placed between the chamber and the camera. The camera exposure  
 134 time was fixed at 0.1 ms for all measurements.

135 We use the collected thermal image to map the image contrast. The thermal  
 136 imaging camera records the number of thermal photons (counts) collected  
 137 by each pixel at location  $(x,y)$ . At first, we normalize the entire image with  
 138 the highest photon count recorded among image pixels. Then, we use this  
 139 normalized photon count at each pixel  $(n(x,y))$  to calculate contrast defined  
 140 using Weber's formula:

$$CR(x,y) = \frac{|n(x,y) - \langle n_{BG} \rangle|}{\langle n_{BG} \rangle} \quad (\text{S7})$$

141 where  $\langle n_{BG} \rangle$  represents the mean photon count from 100 background pixels.

142 Weber contrast maps were generated for CW and AMW when  $\epsilon_+$  or  $\epsilon_-$   
 143 facing the camera (Fig. S9a). Contrast enhancement at each pixel is calculated  
 144 by taking the ratio of contrast values for CW( $\epsilon_-$ ) and AMW( $\epsilon_-$ ) Fig. S9b.

## 145 **Supplementary Note 8 : Emissivity of object,** 146 **background, and window at high temperatures**

147 The emissivity of the object (carbon on tungsten), background (tungsten),  
 148 and window (AMW (OS)) samples were measured at different temperatures  
 149 as detailed under Materials and Methods section. The results are shown in  
 150 Fig. S7. These results are employed to generate Fig. 4d in main text using  
 151 Eq. S6.

152 **Supplementary Note 9 : Spectral filter transmission**

153 Commercially available spectral filters were employed as BP-3.25 (Thorlabs  
 154 FB3250-500) and BP-4.75 (Thorlabs FB4750-500). The transmission spectra  
 155 for these filters are plotted in Fig. S8.

156 **Supplementary Note 10: Reflectance spectra of AMW**

157 For a reciprocal system, an asymmetry in emissivity is equivalent to an asymmetry  
 158 in reflectance. Asymmetric reflection is observed for AMW as shown in  
 159 Fig. S10.

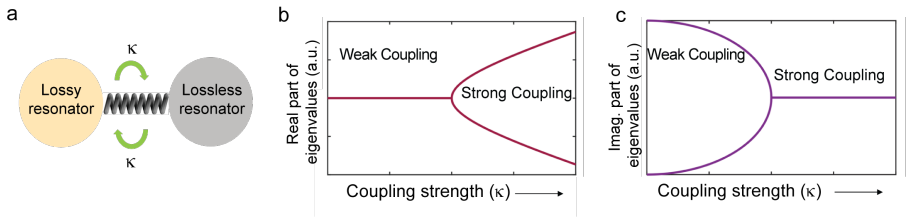

**Fig. S1** The system of coupled lossless and lossy resonators: (a) Schematic showing the coupling between two identical resonators with distinct optical losses. (b) Real and (c) imaginary part of the coupled system's eigen frequencies as a function of the coupling strength,  $\kappa$ .

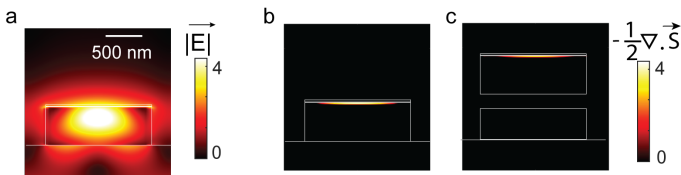

**Fig. S2** (a) The cross-sectional electric field profile at the resonance (3.06  $\mu\text{m}$ ) of CW resonators showing confined mode. (b,c) The Poynting vector plots for (b) CW and (c) AMW structures at resonance showing the source of emission is the 10-nm thin Ti layer



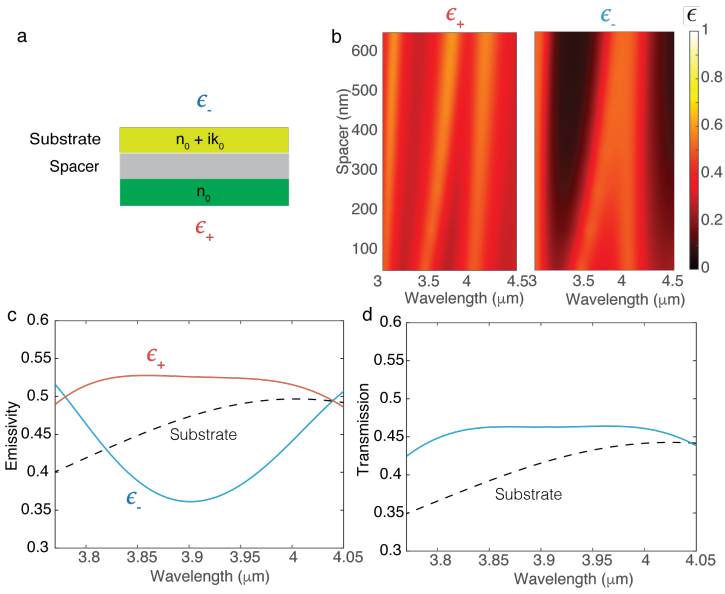

**Fig. S3** (a) Multilayered structure that supports coupled Fabry Perot resonances ( $n_0 = 3, k_0 = 0.05, t_{\text{layer}} = 2 \mu\text{m}$ ). Top resonator has increased dielectric losses breaking the parity symmetry of the structure. (b) Simulated emissivity spectra from the structure for two surfaces ( $\epsilon_+$  and  $\epsilon_-$ ) as function of spacer thickness. (c) and (d) show the emissivity and transmission spectra when spacer thickness = 450 nm. Dashed lines represent the emissivity and transmission from the substrate layer.

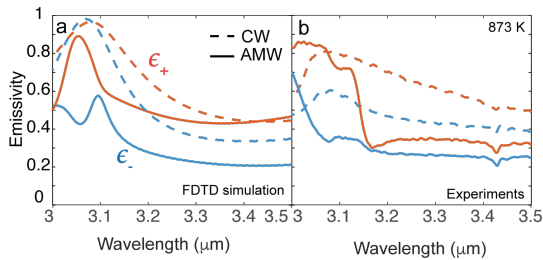

**Fig. S4** (a) The calculated and (b) measured emissivity spectra for CW and AMW towards substrate side ( $\epsilon_+$ ) and opposite side ( $\epsilon_-$ ).

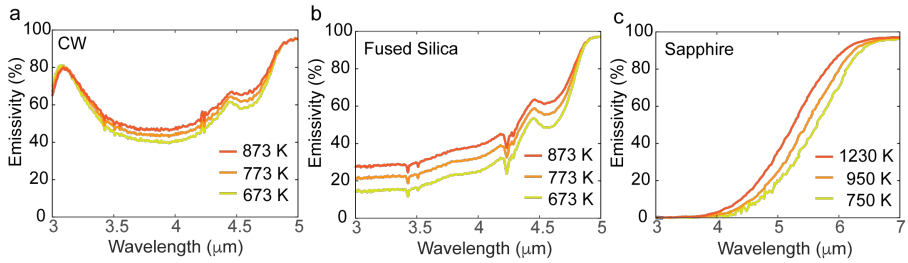

**Fig. S5** Emissivity curves of (a) control window (0.5 mm thick), (b) fused silica (0.5 mm thick), and (c) sapphire (1 mm thick) at elevated temperatures. The emissivities of CW and fused silica were measured and emissivity data of sapphire was taken from Ref. 27.

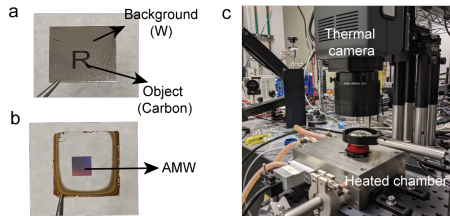

**Fig. S6** (a) The object (Letter 'R') made of carbon on a 1 cm x 1 cm tungsten chip (b) Fabricated AMW on a fused silica substrate (c) An image of the thermal imaging set-up showing the thermal camera and heating chamber.

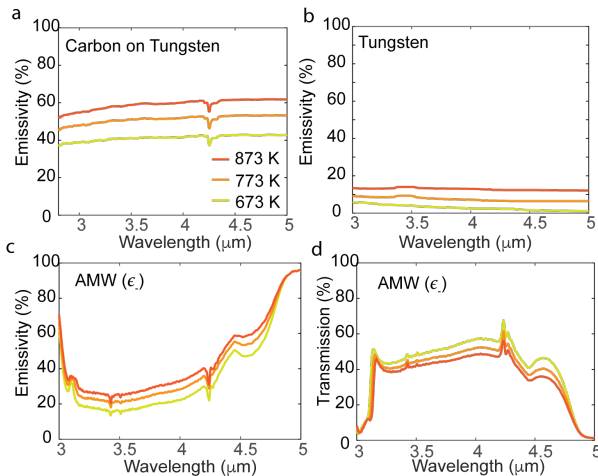

**Fig. S7** Measured emissivity of (a) Carbon film on tungsten (b) bare tungsten substrate and (c) AMW toward the open side ( $\epsilon_{-}$ ). (d) Measured transmission spectra of AMW window. Different colors indicate the temperature at which data were taken.

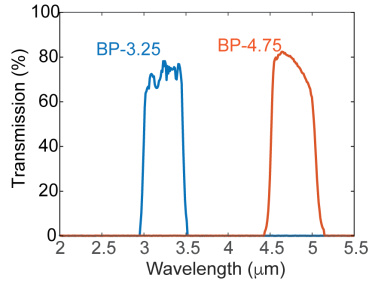

**Fig. S8** The transmission spectra of BP-3.25 (Thorlabs FB3250-500) and BP-4.75 (Thorlabs FB4750-500)

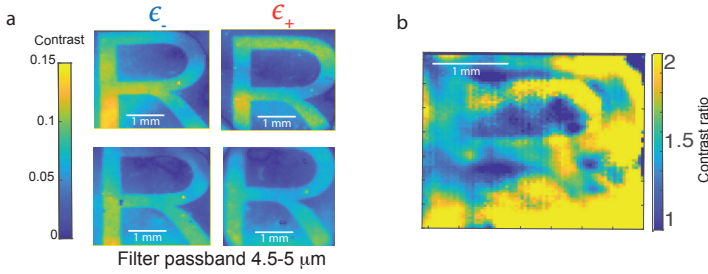

**Fig. S9** (a) Weber contrast maps generated for CW and AMW when  $\epsilon_+$  or  $\epsilon_-$  facing the camera. The images were acquired with a BP-4.75 (4.5–5 μm) bandpass filter in front of the camera. (b) Ratio of weber contrast from AMW ( $\epsilon_-$ ) to that from CW ( $\epsilon_-$ ). Weber contrast map from Fig. 4b was used to generate the ratio at each pixel.

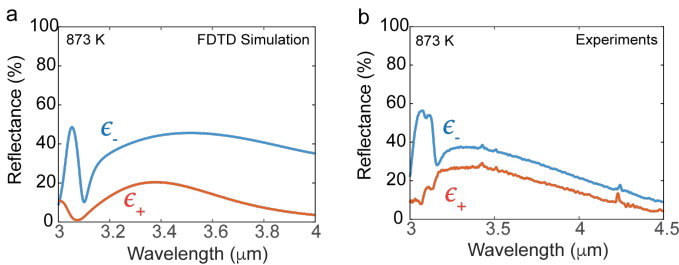

**Fig. S10** Calculated (a) and measured (b) reflectance spectra of AMW in  $\epsilon_-$  and  $\epsilon_+$  directions showing strong asymmetry in reflection.
